# Supplementary material for: Modelling dynamic interactions between soil structure and the storage and turnover of soil organic matter
Source: Copernicus journal article supplement (doi:10.5194/bg-17-5025-2020), 2020-10-19
Supplement: Supplementary file 1 [file bg-17-5025-2020-supplement.pdf]

Supplement of Biogeosciences, 17, 5025–5042, 2020  
<https://doi.org/10.5194/bg-17-5025-2020-supplement>  
© Author(s) 2020. This work is distributed under  
the Creative Commons Attribution 4.0 License.

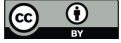

*Supplement of*

## **Modelling dynamic interactions between soil structure and the storage and turnover of soil organic matter**

**Katharina Hildegard Elisabeth Meurer et al.**

*Correspondence to:* Katharina Hildegard Elisabeth Meurer ([katharina.meurer@slu.se](mailto:katharina.meurer@slu.se))

The copyright of individual parts of the supplement might differ from the CC BY 4.0 License.

## Supplementary material

Table S1. List of variables and their symbols used in the model description.

| Symbol          | Description                                                                              | Unit                  |
|-----------------|------------------------------------------------------------------------------------------|-----------------------|
| $f_{agg}$       | aggregation factor                                                                       | $m^3 m^{-3}$          |
| $f_{som}$       | soil organic matter concentration                                                        | $kg kg^{-1}$          |
| $F_{prot}$      | physical protection factor                                                               | -                     |
| $F_{text(mic)}$ | proportion of microporous textural pore space                                            | -                     |
| $I_r$           | below-ground inputs of organic matter                                                    | $kg m^{-2} year^{-1}$ |
| $I_m$           | above-ground inputs of organic matter                                                    | $kg m^{-2} year^{-1}$ |
| $k_{mix}$       | rate coefficient for proportion of organic matter that is mixed annually                 | $year^{-1}$           |
| $k_Y$           | first-order rate constants for the decomposition of young organic matter                 | $year^{-1}$           |
| $k_O$           | first-order rate constants for the decomposition of older organic matter                 | $year^{-1}$           |
| $M_{s(m)}$      | mass of mineral matter                                                                   | $kg m^{-2}$           |
| $M_{s(o)}$      | total mass of organic matter                                                             | $kg m^{-2}$           |
| $M_{Y(mes)}$    | pool of young organic matter in mesoporous soil regions                                  | $kg m^{-2}$           |
| $M_{Y(mic)}$    | pool of young organic matter in microporous soil regions                                 | $kg m^{-2}$           |
| $M_{O(mes)}$    | pool of older organic matter in mesoporous soil regions                                  | $kg m^{-2}$           |
| $M_{O(mic)}$    | pool of older organic matter in microporous soil regions                                 | $kg m^{-2}$           |
| $T_Y$           | source-sink term for the mixing of young organic matter between micropores and mesopores | $kg m^{-2} year^{-1}$ |
| $T_O$           | source-sink term for the mixing of older organic matter between micropores and mesopores | $kg m^{-2} year^{-1}$ |
| $V_t$           | total soil volume                                                                        | $m^3$                 |
| $V_{i(min)}$    | minimum soil volume                                                                      | $m^3$                 |
| $V_s$           | volume of solids                                                                         | $m^3$                 |
| $V_{s(o)}$      | volume of organic matter                                                                 | $m^3$                 |
| $V_{s(m)}$      | volume of mineral matter                                                                 | $m^3$                 |
| $V_p$           | total pore volume                                                                        | $m^3$                 |
| $V_{text}$      | textural pore volume                                                                     | $m^3$                 |
| $V_{mac}$       | macropore volume                                                                         | $m^3$                 |
| $V_{agg}$       | aggregation pore volume                                                                  | $m^3$                 |
| $V_{agg(mic)}$  | volume of aggregation micropores                                                         | $m^3$                 |
| $V_{text(mic)}$ | volume of textural micropores                                                            | $m^3$                 |
| $\alpha, n$     | shape parameters reflecting the pore size distribution                                   | $cm^{-1}, -$          |
| $A_{xs}$        | cross-sectional area (= 1)                                                               | $m^2$                 |
| $\gamma_b$      | soil bulk density                                                                        | $kg m^{-3}$           |
| $\gamma_o$      | organic matter density                                                                   | $kg m^{-3}$           |
| $\gamma_m$      | mineral matter density                                                                   | $kg m^{-3}$           |
| $\varepsilon$   | organic matter retention coefficient                                                     | -                     |

---

|                  |                                                                  |                             |
|------------------|------------------------------------------------------------------|-----------------------------|
| $\phi$           | porosity                                                         | $\text{m}^3 \text{ m}^{-3}$ |
| $\phi_{mac}$     | macroporosity                                                    | $\text{m}^3 \text{ m}^{-3}$ |
| $\phi_{mes}$     | mesoporosity                                                     | $\text{m}^3 \text{ m}^{-3}$ |
| $\phi_{mic}$     | microporosity                                                    | $\text{m}^3 \text{ m}^{-3}$ |
| $\phi_{min}$     | minimum matrix porosity                                          | $\text{m}^3 \text{ m}^{-3}$ |
| $\phi_{mat}$     | matrix porosity                                                  | $\text{m}^3 \text{ m}^{-3}$ |
| $\psi$           | soil water pressure head                                         | cm                          |
| $\psi_{mic/mes}$ | pressure head defining the size of the largest micropore in soil | cm                          |
| $\theta$         | soil water content                                               | $\text{m}^3 \text{ m}^{-3}$ |
| $\Delta z$       | thickness of soil layer                                          | m                           |
| $\Delta z_{min}$ | minimum thickness of soil layer                                  | m                           |

---
